# Supplementary material for: Cerebral Revascularization for the Management of Symptomatic Pure Arterial Malformations
Source: Frontiers journal article supplement (doi:10.3389/fneur.2021.755312), 2021-12-16
Supplement: Data_Sheet_1.pdf [file Data_Sheet_1.pdf]

**Supplementary Table 1.** Summary of previously reported patients with PAM

| Authors, year         | Age, sex   | Lesion location                                    | Associated Symptoms                  |
|-----------------------|------------|----------------------------------------------------|--------------------------------------|
| Sacks, 1969           | 2, male    | Bilateral A2                                       | Viral encephalitis                   |
| Wolpert, 1972         | 21, male   | Bilateral pericallosal                             | Seizure, agenesis of corpus callosum |
| Thompson, 1976        | 39, male   | Distal Lt ACA                                      | Seizure                              |
| Tsukamoto, 1985       | 37, female | Bilateral pericallosal                             | Mania                                |
| Yamada, 1985          | 17, female | Lt ICA, M1 and ACA                                 | Nausea and vomiting                  |
|                       | 40, female | Rt ICA, M1 and ACA                                 | Right sided hemiparesis              |
| Hanakita, 1986        | 43, female | Rt distal ICA & proximal M1; Lt PCA                | Dysarthria                           |
| Araki, 1987           | 25, female | Rt MCA, ACA, & PCA                                 | Rt hemimegalencephaly                |
| Kryst-Widzowska, 1980 | 72, female | Bilateral distal ACAs                              | Aphasia, rt-sided hemiplegia         |
| Doran, 1995           | 14, female | Bilateral pre- & supracallosal segments of ACAs    | Seizure                              |
| Abe, 1997             | 32, male   | Lt MCA                                             | Cortical dysplasia, Szs              |
| Kanemoto, 1998        | 41, female | Lt MCA                                             | Szs, ipsilateral cavernoma           |
| Vanslambrouk, 2000    | 5, male    | Lt ICA, PCoA, PCA, MCA, & Lt SCA                   | Minimal Rt hemiparesis               |
| Metry, 2001           | 1, female  | Lt MCA & supraclinoid ICA                          | PHACE syndrome                       |
| Beringer, 2004        | 49, male   | Bilat pericallosal                                 | Intermittent frontal HA              |
| Baccin, 2007          | 4, female  | Lt supraclinoid ICA & PCoA                         | PHACE syndrome, rt-sided hemiparesis |
|                       | 1, female  | Lt supraclinoid ICA, PCoA, P1, Rt supraclinoid ICA | PHACE syndrome, fever, & hypotonia   |
| Uchino, 2003          | 35, female | Rt SCA                                             | Severe HA                            |
| Shankar, 2009         | 26, female | Distal Rt PCA                                      | Incidental                           |

|                  |            |                                         |                                |
|------------------|------------|-----------------------------------------|--------------------------------|
| McLaughlin, 2013 | 24, female | Lt PCoA & P2                            | Frequent HAs & dizziness       |
| McLaughlin, 2014 | 8, female  | Lt supraclinoid ICA & proximal M1       | Sinus infection                |
| Lanterna, 2014   | 1, male    | Lt PCoA & PCA                           | Infarct from moyamoya          |
| Feliciano, 2014  | 42, male   | Rt MCA                                  | HA w/ basal ganglia hemorrhage |
| Sako, 2016       | 35, male   | Lt PICA                                 | Vertigo                        |
| Oushy, 2021      | 47, female | Rt ACA                                  | Incidental                     |
|                  | 41, female | Lt Supraclinoid ICA, MCA, BA, PCoA, PCA | Diplopia, ptosis               |
|                  | 17, male   | Rt SCA                                  | HA, dizziness                  |
|                  | 10, female | Lt Supraclinoid ICA, PCoA, PCA          | Severe HA                      |
|                  | 11, male   | Lt Supraclinoid ICA, PCoA               | Incidental                     |
|                  | 25, female | Lt ACA                                  | Incidental                     |
|                  | 33, female | Lt ACA                                  | Incidental                     |
|                  | 19, female | Lt MCA                                  | Incidental                     |
|                  | 27, female | BA                                      | HA, Lt numbness                |
|                  | 38, female | Lt PICA                                 | Incidental                     |
|                  | 48, male   | Rt PCoA                                 | Coma                           |
|                  | 51, female | Lt MCA                                  | Incidental                     |
|                  | 25, female | Bilateral Supraclinoid ICA, MCA, PCoA   | HA                             |
|                  | 27, male   | Rt ACA                                  | Incidental                     |
|                  | 17, female | Rt PICA                                 | Incidental                     |
|                  | 21, female | Rt PCoA                                 | HA                             |

|               |            |                                                                 |                                                         |
|---------------|------------|-----------------------------------------------------------------|---------------------------------------------------------|
|               | 50, female | Rt MCA                                                          | Incidental                                              |
|               | 46, female | Lt supraclinoid ICA, A1                                         | Incidental                                              |
|               | 37, female | Lt MCA                                                          | HA                                                      |
|               | 54, female | Bilateral Rt PCA, supraclinoid ICA, PCoA, BA                    | Incidental                                              |
|               | 12, male   | Rt PCA, PCoA; Lt ICA, ACA, MCA                                  | Incidental                                              |
|               | 36, female | Rt ACA                                                          | HA                                                      |
|               | 38, female | BA                                                              | Incidental                                              |
|               | 17, female | Lt supraclinoid ICA, MCA, ACA                                   | seizures                                                |
|               | 26, male   | Rt supraclinoid ICA, PCoA, MCA                                  | HA                                                      |
| Munich, 2019  | 37, female | ACoA and BA (superior to basilar apex)                          | Headache, blurry vision and a partial left CN III palsy |
| He, 2019      | 42, male   | Rt ACA                                                          | Headache                                                |
| Li, 2020      | 77, male   | Lt AICA                                                         | SAH                                                     |
| Yao, 2021     | 51, male   | Rt PICA                                                         | SAH                                                     |
|               | 48, male   | Rt the first branch of intracranial segment of vertebral artery | SAH                                                     |
| Present study | 43, female | Lt ICA                                                          | Right-sided weakness                                    |
|               | 45, female | Rt ICA and P1                                                   | SAH                                                     |

ACA: anterior cerebral artery; ACoA: anterior communicating artery; BA: basilar artery; Lt: left; CN: cranial nerve; ICA: internal carotid artery; MCA: middle cerebral artery; Rt: right; PAM: Pure arterial malformations; PCA: posterior cerebral artery; PCoA: posterior communicating artery; PICA: posterior inferior cerebellar artery; SCA: superior cerebellar artery.

**Supplementary Table 2.** The correlation between side of PAM and artery involved.

| Artery involved | Side      |            | P-value |
|-----------------|-----------|------------|---------|
|                 | Bilateral | Unilateral |         |
| ACA             | 7         | 11         | 0.02    |
| Non-ACA         | 4         | 31         |         |

ACA: anterior cerebral artery; PAM: pure arterial malformation.

**Supplementary Table 3.** The correlation between location of PAM and number of arteries involved.

| Number of<br>arteries involved | Lesion location      |                       | P-value |
|--------------------------------|----------------------|-----------------------|---------|
|                                | Anterior circulation | Posterior circulation |         |
| $\geq 2$                       | 10                   | 0                     | 0.038   |
| 1                              | 23                   | 11                    |         |

PAM: pure arterial malformation.
